# Supplementary material for: Chemical mapping and electrical conductivity of carbon nanotube patterned arrays
Source: Royal Society of Chemistry journal article supplement (doi:10.1039/c1jm11107h), 2011-01-01
Supplement: c1jm11107h.pdf [file c1jm11107h.pdf]

## Electronic Supplementary Information

2-point I-V measurements were conducted for varying contact spacings along a printed structure to determine the resistance of the CNT/PDMADMAC LbL assemblies. The contact spacing versus resistance plot is shown in Figure S1.

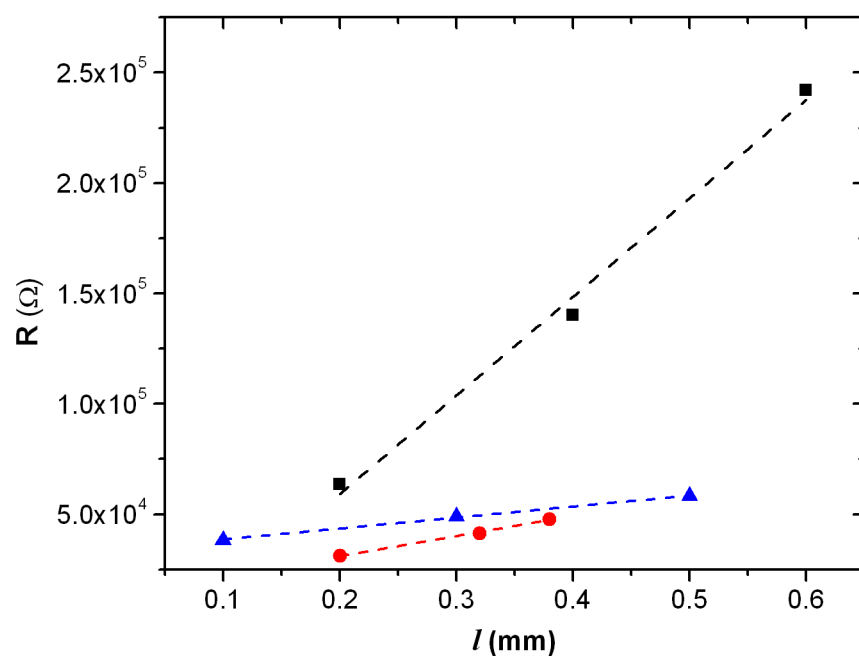

**Figure S1.** Resistance ( $R$ ) of patterns with 3 (■), 5 (●), or 8 (▲) bilayers versus distance between probe points ( $l$ ) for 2-point conductivity measurements. Dashed lines were linearly regressed to the data.
